# Supplementary material for: Cognitive Profiles in Preschool Children at Risk for Co-Occurring Dyslexia and ADHD
Source: MDPI journal article supplement (doi:10.3390/educsci14040435), 2024-04-20
Supplement: s1 [file s1]

# Cognitive Profiles in Preschool Children at Risk for Co-Occurring Dyslexia and ADHD

## Supplementary materials

**Table S1.** Group differences when including nonverbal IQ as a covariate

|                                    | Group                          | Nonverbal IQ                   |
|------------------------------------|--------------------------------|--------------------------------|
| Verbal short-term memory component | $F(2, 144) = 22.567, p < .001$ | $F(1, 144) = 1.608, p = .207$  |
| Executive functioning component    | $F(2, 144) = 40.25, p < .001$  | $F(1, 144) = 15.11, p < .001$  |
| Nogo accuracy (go/nogo)            | $F(2, 144) = 3.045, p = .051$  | $F(1, 144) = 1.577, p = .2113$ |
| Shifting accuracy/ difference      | $F(2, 141) = 17.182, p < .001$ | $F(1, 144) = 0.199, p = .656$  |
| Flanker accuracy difference        | $F(2, 140) = 1.739, p = .179$  | $F(1, 144) = 0.517, p = .473$  |
| Processing speed index score       | $F(2, 144) = 10.285, p < .001$ | $F(1, 144) = 0.662, p = .417$  |
| Receptive vocabulary               | $F(2, 144) = 6.099, p < .01$   | $F(1, 144) = 6.996, p < .01$   |

**Table S2.** Group differences when including age as a covariate.

|                                    | Group                           | Age                             |
|------------------------------------|---------------------------------|---------------------------------|
| Verbal short-term memory component | $F(2, 145) = 23.07, p < .001$   | $F(1, 145) = 1.95, p = .165$    |
| Executive functioning component    | $F(2, 145) = 38.841, p < .001$  | $F(1, 145) = 6.518, p = .0117$  |
| Nogo accuracy (go/nogo)            | $F(2, 145) = 3.073, p = .0493$  | $F(1, 145) = 0.570, p = .4513$  |
| Shifting accuracy/ difference      | $F(2, 142) = 16.822, p < .001$  | $F(1, 142) = 0.868, p = .353$   |
| Flanker accuracy difference        | $F(2, 141) = 1.572, p = .211$   | $F(1, 141) = 0.186, p = .667$   |
| Processing speed index score       | $F(2, 145) = 11.88, p < .001$   | $F(1, 145) = 19.85, p < .001$   |
| Receptive vocabulary               | $F(2, 145) = 6.141, p = .00276$ | $F(1, 145) = 1.734, p = .18994$ |
